# Supplementary material
Source: HighWire-hosted journal article supplement (https://emj.bmj.com/content/36/7/410)
Supplement: inline-supplementary-material-1 [file inline-supplementary-material-1.docx]

Japanese abstract

題名：院外心停止の病院前気道管理の観察研究での交絡因子としての救急隊現着時の自己心拍確認

目的

多くの病院前心停止例のレジストリー研究ではバッグバルブマスク換気（BVM）による気道管理が転帰良好と独立して関連していた。本研究では救急隊現着時に自己心拍が確認された症例でこの因子が病院前気道管理の研究の交絡因子となるか検討した。

方法

このコホート研究は日本の関東地区で2012年に施行されたレジストリー（SOS-KANTO2012）のデータを用いて行われた。高度気道管理器具（AAM）とBVMの2群間で救急隊現着時の心拍確認や1ヶ月後の神経学的転帰が比較された。神経学的転帰良好はCerebral Performance Categories Scaleで１、２と定義された。多重ロジスティック回帰分析で神経学的転帰との関連を、年齢、性別、心原性心停止の有無、目撃者の有無、ショック波形の有無、バイスタンダー心肺蘇生の有無、BVM気道管理の有無、救急隊現着時の自己心拍確認の有無で検討した。

結果

SOS-KANTO 2012 研究の16452例より12867例が検討され、5893例がAAM群、6974例がBVM群であった。検討例中、救急隊現着時の自己心拍確認が356例（2.9％）、神経学的転帰良好例が; 340例 (2.6%)みられた。救急隊現着時の自己心拍確認例の比はBVM群(272: 3.9%)で、AAM群(114: 1.9%)に比して有意(95% CI: 1.65 to 2.25)に高値であった。神経学的転帰良好は救急隊現着時の自己心拍確認例で30% (117/386)、非自己心拍再開例で 1.8% (223/12481)で有意差を認めた。多重ロジスティック回帰分析で救急隊現着時の自己心拍確認の因子を加えると神経学的転帰良好に対するBVM因子のオッズ比が3.24 (2.49 to 4.20) から2.60 (1.97 to 3.44)へ低下した。

結語

救急隊現着時の自己心拍確認の因子は病院前気道管理器具の観察研究において交絡因子と考えるべきである。

*"This abstract has been translated and adapted from the original English-language content. Translated content is provided on an "as is" basis. Translation accuracy or reliability is not guaranteed or implied.  BMJ is not responsible for any errors and omissions arising from translation to the fullest extent permitted by law, BMJ shall not incur any liability, including without limitation, liability for damages, arising from the translated text.”*
